# Supplementary material
Source: PubMed Central journal article supplement (PMC3541288)
Supplement: auto-8-1782-s01.pdf [file auto-8-1782-s01.pdf]

## **Supplemental Material to:**

**Seung-Il Choi, Bong-Yoon Kim, Shorafidinkhuja  
Dadakhujaev, Jun-Young Oh, Tae-Im Kim, Joo Young Kim  
and Eung Kweon Kim**

**Impaired autophagy and delayed autophagic clearance  
of transforming growth factor  $\beta$ -induced protein (TGFB1)  
in granular corneal dystrophy type 2**

**Autophagy 2012; 8(12)**

**<http://dx.doi.org/10.4161/auto.22067>**

**[www.landesbioscience.com/journals/autophagy/article/22067](http://www.landesbioscience.com/journals/autophagy/article/22067)**

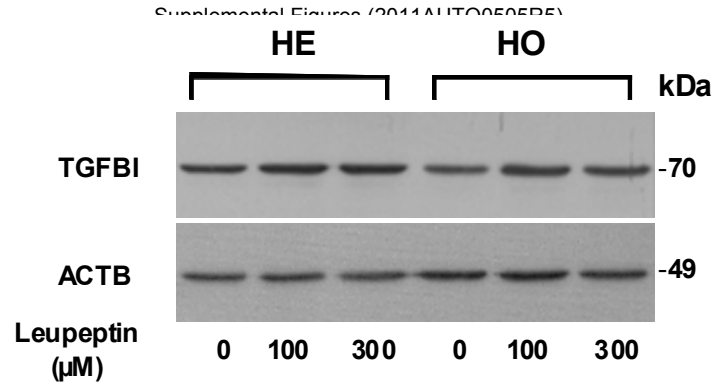

**Figure S1.** TGFB1 was degraded by Autophagy. Primary HE and HO corneal fibroblasts were incubated with different doses of leupeptin (100 and 300 μg/ml), and TGFB1 protein levels were determined by immunoblot analysis with an anti-TGFB1 antibody.

**FIGURE S2**

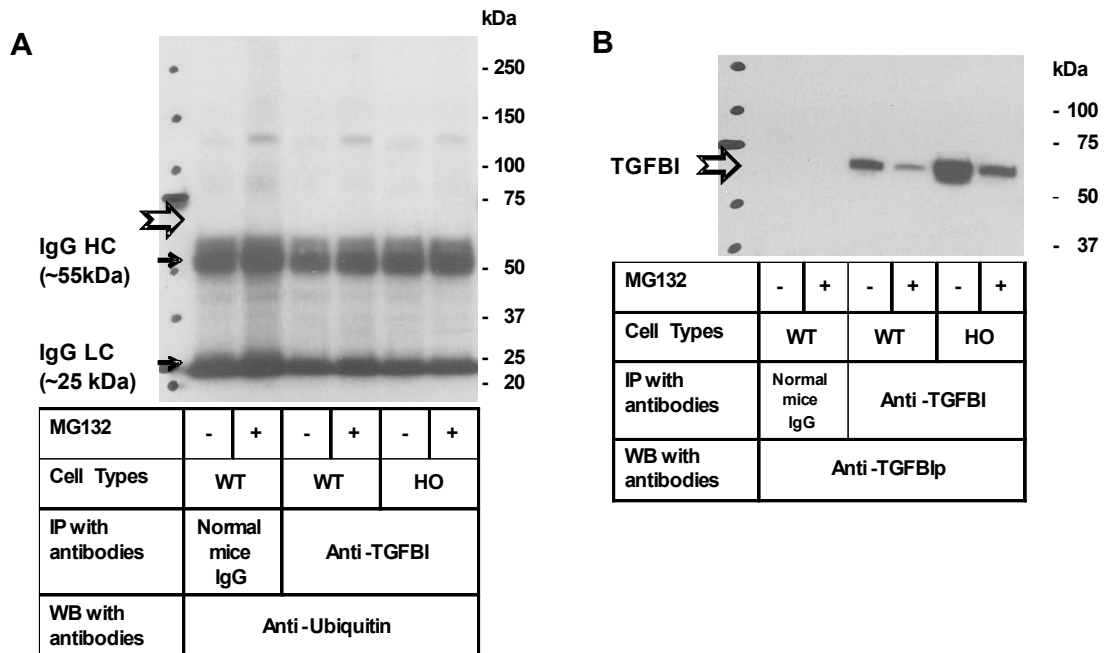

**Figure S2.** TGFBI was not ubiquitinated in WT and GCD2 Corneal Fibroblasts. WT and GCD2 corneal fibroblasts treated with or without MG132 for 12 h. Cells were lysed and incubated with anti-TGFBI or normal mouse IgG (2  $\mu$ l of antibodies for 500  $\mu$ l of cells homogenized in RIPA buffer). Immunoprecipitated proteins were analyzed on 10% SDS PAGE gels, western blotted then probed with either anti-ubiquitin antibodies (1:1000 dilution) (A) purchased from LifeSensor (Malvern, VU101) and used at a 1/1000 dilution or anti-TGFBI antibodies (B).

### **FIGURE S3**

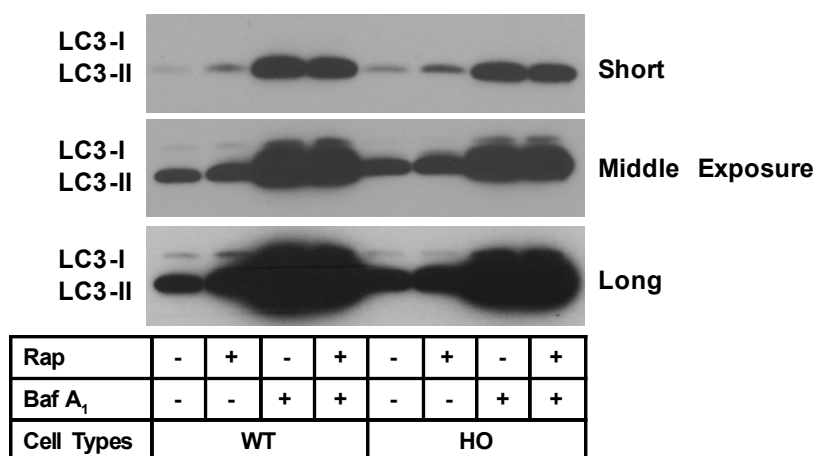

**Figure S3.** WT and GCD2 HO corneal fibroblasts were treated with Rap (100 nM) and Baf A<sub>1</sub> (0.1  $\mu$ M) individually and in combination for 14 h. Cells were lysed and immunoblotted with anti-LC3 antibodies. Short (first panel), middle (second panel), and long (third panel) exposure times were applied in order to better visualize the differences in LC3-I and LC3-II levels between the samples.

**FIGURE S4**

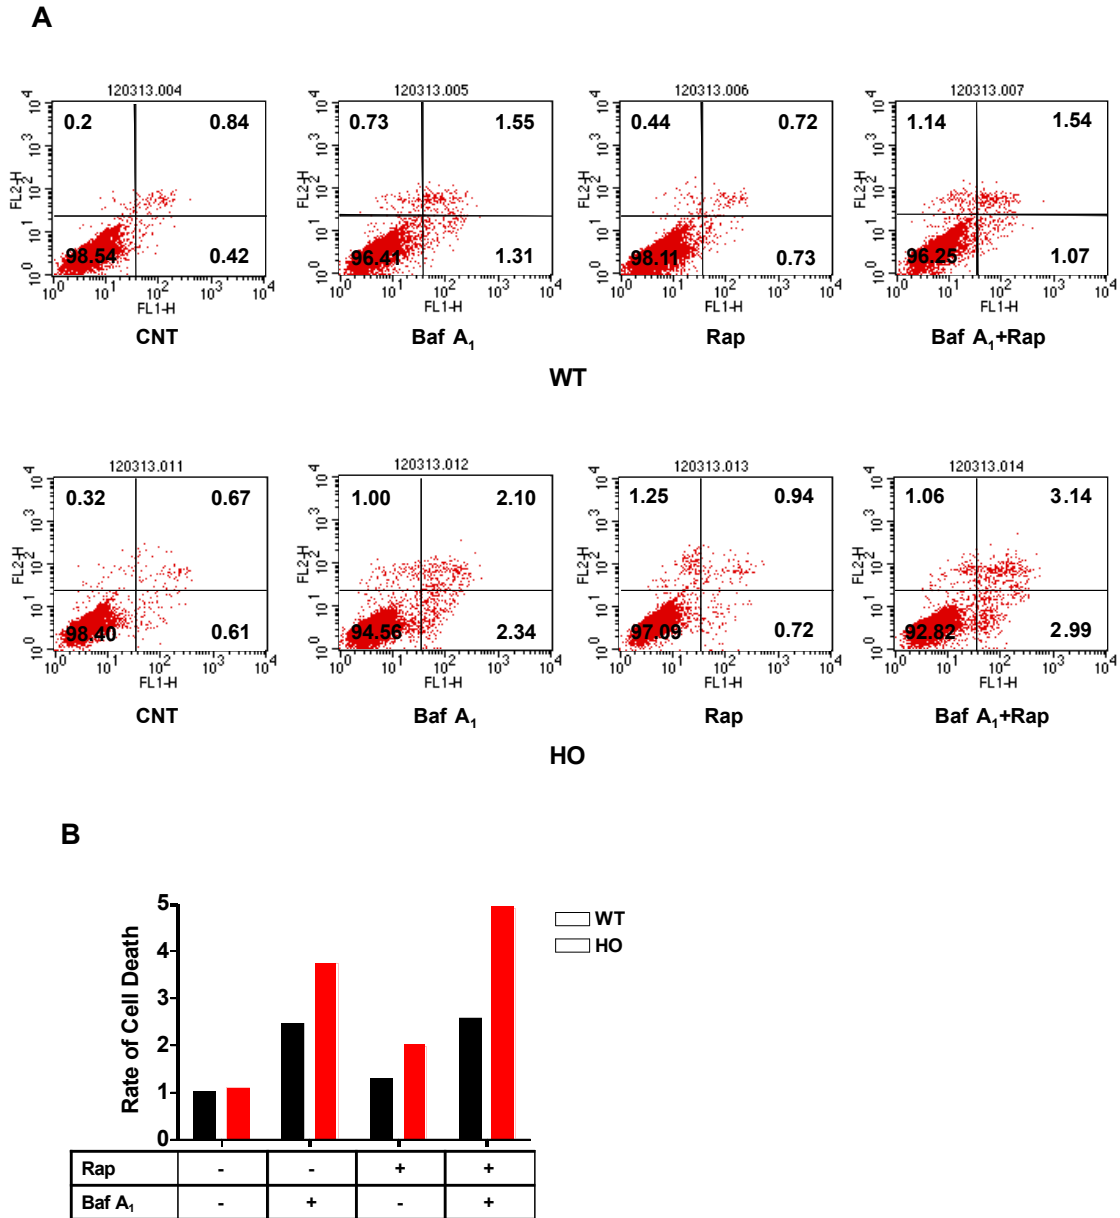

**Figure S4.** GCD HO corneal fibroblasts were most susceptible to autophagy inhibition-induced cell death. **(A)** Cell death was quantified using AnnexinV-FITC and PI staining in FACS. Percentages indicate percentage of cells in the respective quadrants. Corneal fibroblasts cells were divided into four groups: control (no treatment), Baf A<sub>1</sub> (treated

## Supplemental Figures (2011AUTO0505R5)

with 0.1  $\mu\text{M}$  of Baf  $A_1$ ), Rap (treated with 100 nM of Rap), and Baf  $A_1$  plus Rap (treated with both 0.1  $\mu\text{M}$  of Baf  $A_1$  and 100 nM of Rap) for 24 h. The cell viability was measured by FACS analysis. The gate setting divides the cells in four populations: upper left (UL), necrotic cells; upper right (UR), late apoptotic cells; Lower left (LL), viable cells; lower right (LR) early apoptotic cells. Cells in the UL, UR and LR regions combined together give the proportion with cell death. **(B)** Cells in the UL, UR and LR regions represent the rate of cell death.
